# Supplementary material for: Extracellular Vesicles as Markers of Liver Function: Optimized Workflow for Biomarker Identification in Liver Disease
Source: Int J Mol Sci. 2023 Jun 1;24(11):9631. doi: 10.3390/ijms24119631 (PMC10253831; doi:10.3390/ijms24119631)
Supplement: Supplementary file 1 [file ijms-24-09631-s001.zip]

Archive with 7 entries (7 files):
- Supplementary.Figures.pdf
- Supplementary.File_S1.pdf
- Supplementary.Table_S1.xlsx
- Supplementary.Table_S2.xlsx
- Supplementary.Table_S3.xlsx
- Supplementary.Table_S4.xlsx
- Supplementary.Table_S5.xlsx
