# Supplementary material for: Extracellular Vesicles as Markers of Liver Function: Optimized Workflow for Biomarker Identification in Liver Disease
Source: Int J Mol Sci. 2023 Jun 1;24(11):9631. doi: 10.3390/ijms24119631 (PMC10253831; doi:10.3390/ijms24119631)
Supplement: Supplementary file 1 [file ijms-24-09631-s001.zip › Supplementary.Table_S1.xlsx]

## Sheet: Tabelle1
Supplementary Table 1. Biochemical parameters in Gunn and control rats
Serum Gunn Rat
No.	Sample	T-Bil mg/dl	direct Bil mg/dl	indirect Bil mg/dl	Alb g/dl	Experiment
1	Gunn hetero 1	0.1	0	0.1	3.9
2	Gunn hetero 2	0.1	0	0.1	4.2
3	Gunn hetero 3	0.1	0	0.1	4
4	Gunn hetero 4	0.1	0	0.1	3.8
5	Gunn WT1	0.1	0	0.1	4.3
6	Gunn WT2	0.1	0	0.1	4.1
7	Gunn WT3	0.1	0	0.1	3.9
8	normal WT1	0.1	0	0.1	3.6
9	normal WT2	0.13	0	0.13	4.2
10	normal WT3	0.1	0	0.1	3.6
11	Gunn homo 1	5.23	0.32	4.91	3.5
12	Gunn homo 2	5.24	0.33	4.91	3.5
13	Gunn homo 3	3.72	0.35	3.37	4.4
14	Gunn homo 4	2.22	0.44	1.78	3.9
	T-Bil mg/dl	SD
CTRL rat	0.105	0.0111803
Gunn hetero	0.1	0
Gunn homo	4.1025	1.25053
	direct Bil mg/dl
CTRL rat	0	0
Gunn hetero	0	0
Gunn homo	0.36	0.0474342
	indirect Bil mg/dl
CTRL rat	0.105	0.0111803
Gunn hetero	0.1	0
Gunn homo	3.7425	1.29579
	Alb g/dl
CTRL rat	3.95	0.275379
Gunn hetero	3.975	0.147902
Gunn homo	3.825	0.369966
