# Supplementary material for: Extracellular Vesicles as Markers of Liver Function: Optimized Workflow for Biomarker Identification in Liver Disease
Source: Int J Mol Sci. 2023 Jun 1;24(11):9631. doi: 10.3390/ijms24119631 (PMC10253831; doi:10.3390/ijms24119631)
Supplement: Supplementary file 1 [file ijms-24-09631-s001.zip › Supplementary.Table_S2.xlsx]

## Sheet: ps110
Supplementary Table 2. Assessment of the reproducibility of NTA measurements across different days
Date	Name	Particle Visual Fields (PVF)	Conc. (p./mL)	Orig. Conc. (p./cm^3)	X50 (nm)	Peak ø (nm)	Span	Drift (µm/s)	Removal
09.03.2018	ps110.test	279.6	46000000	12000000000000	111.9	116.3	0.6	10.6
09.03.2018	ps110.test	213.4	35000000	8900000000000	111	113	0.7	9.3
27.02.2018	ps110.test	224.7	37000000	9300000000000	108.5	112	0.6	10.6
27.02.2018	ps110.test	218.9	36000000	9100000000000	106.6	110.3	0.7	7.1
26.02.2018	ps110.test	227	38000000	9400000000000	109.6	114.1	0.7	7.6
26.02.2018	ps110.test	228.2	38000000	9500000000000	106.7	110	0.7	7
21.02.2018	ps110.test	197.9	33000000	8200000000000	115.2	117.3	0.7	6.3
21.02.2018	ps110.test	234.5	39000000	9700000000000	112.1	115.3	0.7	9.8
20.02.2018	ps110.test	234.2	39000000	9700000000000	108.7	112.5	0.7	8.3
20.02.2018	ps110.test	200.5	33000000	8300000000000	108.7	109.3	0.7	7.2
19.02.2018	ps110.test	212.3	35000000	8800000000000	107	108.6	0.7	6.8
19.02.2018	ps110.test	183.1	30000000	7600000000000	116.7	120.9	0.8	9.7
16.02.2018	ps110.test	248.9	41000000	10000000000000	109.4	111.3	0.7	10.2
16.02.2018	ps110.test	261.7	43000000	11000000000000	110.4	118.1	0.7	8.8
06.02.2018	ps110.test	247.7	41000000	10000000000000	107.7	114.4	0.7	6.7
06.02.2018	ps110.test	242	40000000	10000000000000	108	111.8	0.7	4.8
02.02.2018	ps110.test	226.1	38000000	9400000000000	113.7	118.1	0.7	9
02.02.2018	ps110.test	219.5	36000000	9100000000000	112.7	116	0.7	8
29.01.2018	ps110.test	252.6	42000000	10000000000000	111	115.7	0.7	10.2
29.01.2018	ps110.test	240.4	40000000	10000000000000	108.5	114.1	0.6	8.1
08.05.2018	ps110.test	329.4	55000000	13750000000000	110.1	111.9	0.7	7.5
08.05.2018	ps110.test	295.6	49000000	12000000000000	109.4	115.6	0.7	7.1
		Particle Visual Fields (PVF)	Conc. (p./mL)	Orig. Conc. (p./cm^3)	X50 (nm)	Peak ø (nm)
	Average	237.191	3.92727e+07	9.80682e+12	110.164	113.936
	StDev	33.066	5.55648e+06	1.38085e+12	2.69047	3.18756
Note, Particle Matrix indicates the PVF as "Av. No of Particles"
