# Supplementary material for: Extracellular Vesicles as Markers of Liver Function: Optimized Workflow for Biomarker Identification in Liver Disease
Source: Int J Mol Sci. 2023 Jun 1;24(11):9631. doi: 10.3390/ijms24119631 (PMC10253831; doi:10.3390/ijms24119631)
Supplement: Supplementary file 1 [file ijms-24-09631-s001.zip › Supplementary.Table_S3.xlsx]

## Sheet: Tabelle1
Supplementary Table 3. Cytokine measurement by Luminex in the WS and LyEVs of CCA patients
Type	Name	Well	Hu IL-2 (38)	Hu IL-4 (52)	Hu IL-6 (19)	Hu IL-8 (54)	Hu IL-10 (56)	Hu GM-CSF (34)	Hu IFN-g (21)	Hu TNF-a (36)		Type	Name	Well	Hu IL-2 (38)	Hu IL-4 (52)	Hu IL-6 (19)	Hu IL-8 (54)	Hu IL-10 (56)	Hu GM-CSF (34)	Hu IFN-g (21)	Hu TNF-a (36)
X1	WS.01	B2	0.15			1.12	0.01				Whole Serum	X43	EVs.01	D7	0.46			0.57	0.72	0.76			Evs-enriched
X2	WS.02	C2	0.75			0.02					Measured 50 uL	X44	EVs.02	E7	0.46	0.05		0.64	1.15	0.76	0.08		Diluted in 50uL PBS
X3	WS.03	D2	0.15	0.05		0.17					undiluted	X45	EVs.03	F7	0.46				1.73	0.11			+48 uL LysBuf +2uL BSA
X4	WS.04	E2	4.45			1.92	0.57					X46	EVs.04	G7	0.15	0.05		0.17	1.73	1.12		2.95	Measured 50 uL
X5	WS.05	F2	0.9			2.4				5.99		X47	EVs.05	H7	0.46			0.1	1	0.76
	AVE		1.28	0.05	#DIV/0!	1.126	0.29	#DIV/0!	#DIV/0!	5.99			AVE		0.398	0.05	#DIV/0!	0.37	1.266	0.702	0.08	2.95
	SD		1.80472	#DIV/0!	#DIV/0!	1.0477	0.39598	#DIV/0!	#DIV/0!	#DIV/0!			SD		0.138636	0	#DIV/0!	0.274348	0.45081	0.365814	#DIV/0!	#DIV/0!
X6	WS.06	G2	0.61		1.17	12.9	0.29			1.17	<--- This side	X48	EVs.06	A8	0.75			1.28	1.15	1.22			<--- This side
X7	WS.07	H2	0.46	0.12		1.24						X49	EVs.07	B8	0.61	0.05		2.88	1.44	2.1	0.9	1.17
X8	WS.08	A3	0.15			0.83						X50	EVs.08	C8	0.15			0.88	0.43	0.76
X9	WS.09	B3	0.75			6.3				1.17		X51	EVs.09	D8	0.75	0.09		1.6	0.57	1.17	1.99	2.95
X10	WS.10	C3	0.75	0.05	1.99	7.12				7.38		X52	EVs.10	E8	0.46			0.49	0.86	0.66
X11	WS.11	D3	0.15			3.05				7.38		X53	EVs.11	F8	0.46			0.41	1.15	1.37
X12	WS.12	E3	0.61		0.13	3.05	0.57					X54	EVs.12	G8	0.75			0.96	2.02	0.87	1.63	1.17
X13	WS.13	F3	1.32	0.05		1.04				14.95		X55	EVs.13	H8	1.04		0.07	7.28	1.73	0.43	1.45	1.17
X14	WS.14	G3	0.46	0.05		1.28						X56	EVs.14	A9	0.46	0.05		0.49	1.73	0.55	0.54
X15	WS.15	H3	0.46			0.41						X57	EVs.15	B9	0.75	0.05	0.07	2.4	1.15	1.7	1.99
X16	WS.16	A4	0.75			48.24				5.99		X58	EVs.16	C9	0.46			3.85	0.86	0.71
X17	WS.17	B4	1.04			29.12	0.15			5.99		X59	EVs.17	D9	1.32			0.96	1.73	2.8
X18	WS.18	C4	0.46			4.18						X60	EVs.18	E9	0.75	0.05		0.64	0.86	0.18		1.17
X19	WS.19	D4	0.31		0.53	4.02						X61	EVs.19	F9				3.21	1.73	1.07	0.08
X20	WS.20	E4	28.46			3.53	18.75			5.99		X62	EVs.20	G9	1.61	0.6		0.8	17.24	0.6	0.54	17.29
X21	WS.21	F4	1.04			1.91	0.57			12.54		X63	EVs.21	H9	1.61	0.32	0.07	4.02	1.73	0.76	1.63	0.26
