# Supplementary material for: Extracellular Vesicles as Markers of Liver Function: Optimized Workflow for Biomarker Identification in Liver Disease
Source: Int J Mol Sci. 2023 Jun 1;24(11):9631. doi: 10.3390/ijms24119631 (PMC10253831; doi:10.3390/ijms24119631)
Supplement: Supplementary file 1 [file ijms-24-09631-s001.zip › Supplementary.Table_S4.xlsx]

## Sheet: Sheet1
	Supplementary Table 4. List of primers used in this study
	Name	Sequence (5’ --> 3’)
	UPm2A	CCCAGTTATGGCCGTTTA
	rno-Let-7a	GAGGTAGTAGGTTGTATAGTTGG
	rno-Let-7c	TAGTAGGTTGTATGGTTG
	rno-Let-7e	TAGGAGGTTGTATAGTTG
	rno-miR-1	TGGAATGTAAAGAAGTATGTATGG
	rno-miR-10a	CTGTAGATCCGAATTTGTGG
	rno-miR-122	GAGTGTGACAATGGTGTTTGG
	rno-miR-142-3p	TGTAGTGTTTCCTACTTTATGGAG
	rno-miR-148a-3p	TCAGTGCACTACAGAACTTTGG
	rno-miR-150	CCAACCCTTGTACCAGTGG
	rno-miR-155	TTAATGCTAATTGTGATAGGGGTG
	rno-miR-15a	TAGCAGCACATAATGGTTTGTGG
	rno-miR-15b	TAGCAGCACATCATGGTTTACAG
	rno-miR-16	CAGCACGTAAATATTGGCGG
	rno-miR-18a	GGTGCATCTAGTGCAGATAGG
	rno-miR-192	TGACCTATGAATTGACAGCCG
	rno-miR-194	GTAACAGCAACTCCATGTGGAG
	rno-miR-21	TAGCTTATCAGACTGATGTTGAG
	rno-miR-29b	TAGCACCATTTGAAATCAGTGTTG
	rno-miR-221	ATTGTCTGCTGGGTTTCG
	rno-miR-223	TCAGTTTGTCAAATACCCCAG
	rno-miR-26a	AAGTAATCCAGGATAGGCTG
	rno-miR-33a	TGCATTGTAGTTGCATTGCAG
	rno-miR-34a	CAGTGTCTTAGCTGGTTGTG
	rno-miR-92a-3p	CTTGTCCCGGCCTGG
	rno-miR-98	AGGTAGTAAGTTGTATTGTTGG
