# Supplementary material for: Extracellular Vesicles as Markers of Liver Function: Optimized Workflow for Biomarker Identification in Liver Disease
Source: Int J Mol Sci. 2023 Jun 1;24(11):9631. doi: 10.3390/ijms24119631 (PMC10253831; doi:10.3390/ijms24119631)
Supplement: Supplementary file 1 [file ijms-24-09631-s001.zip › Supplementary.Table_S5.xlsx]

## Sheet: Tabelle1
Supplementary Table 5. Baseline biochemical parameters in CCA patient groups
Type of sample	Code on 8Plex	sex	BMI	age	Tumor localisation	T	N	M	R	G
CCA	S.06	male	19.32	65	intrahepatic CCA	T3	N1	M0	R0	G3
CCA	S.07	male	26.3	76	intrahepatic CCA	T3	N1	M1	R0	G3
CCA	S.08	female	32.39	52	intrahepatic CCA	T3	N1	M1	R0	G3
CCA	S.09	female	19.15	49	intrahepatic CCA	T2	N0	M0	R0	G2
CCA	S.10	female	24.8	68	intrahepatic CCA	T2			R0	G3
CCA	S.11	female	23.03	75	intrahepatic CCA	T4		M1
CCA	S.12	male	22.6	54	intrahepatic CCA	T1	N1	M0	R1	G2
CCA	S.13	female	21.87	60	intrahepatic CCA	T2	N0	M0	R1	G3
CCA	S.14	male	22.47	42	intrahepatic CCA	T2		M0	R0	G2
CCA	S.15	female	31.18	42	intrahepatic CCA	T2	N1	M0	R0	G2
CCA	S.16	female	24.61	84	intrahepatic CCA	T3	N0	M0	R0	G2
CCA	S.17	male	27.12	84	intrahepatic CCA	T1	N0	M0	R0	G2
CCA	S.18	male	27.7	80	intrahepatic CCA	T1	N0		R0	G3
CCA	S.19	female	31.25	74	intrahepatic CCA	T3	N1	M0	R0	G2
CCA	S.20	female	21.97	61	intrahepatic CCA	T3	N0	M0	R1	G3
CCA	S.21	male	31.7	55	intrahepatic CCA	T4	N1	M1	R1
